# Supplementary material
Source: Springer Nature journal article supplement (https://www.springermedizin.de/resource/supplementary/12998_2011_58_MOESM17_ESM.pdf/9680054)

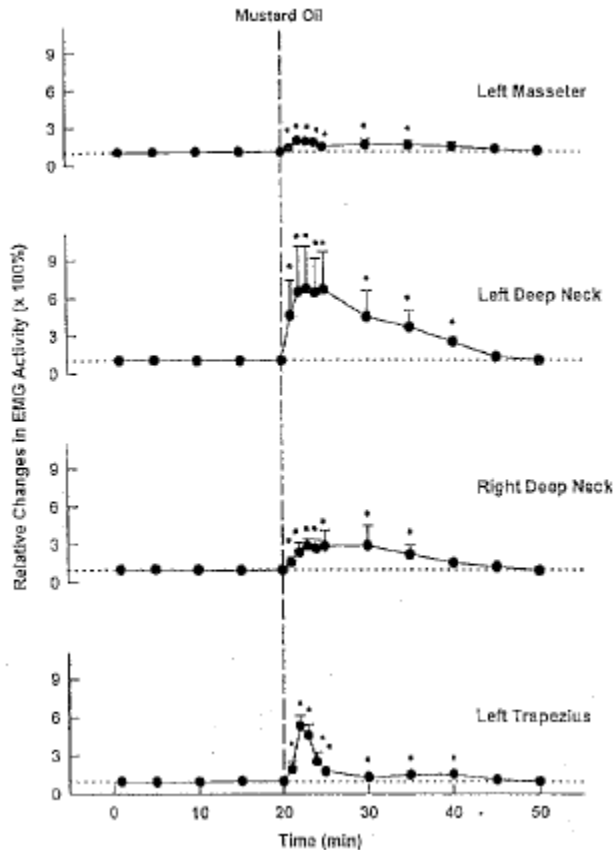

Figure 19. Sagittal sinus injection. (Hu et al., [112])

Supplement: MOESM17 [file 9680054]
